# Supplementary material for: Aberrant miRNAs expressed in HER-2 negative breast cancers patient
Source: J Exp Clin Cancer Res. 2018 Oct 20;37:257. doi: 10.1186/s13046-018-0920-2 (PMC6196003; doi:10.1186/s13046-018-0920-2)
Supplement: Supplementary file 1 — Table S1. TCGA tissue microRNAs differentially expressed for TNBC versus normal tissue (fold change ≤ -1.5 or ≥ 1.5, p-value < 0.05). (XLSX 38 kb) [file 13046_2018_920_MOESM1_ESM.xlsx]

## Sheet: TNBC_tcga_miR
# Notes : Created from Advanced Analysis operation: significance Analysis.
#Entitylist : All Entities
#Interpretation : status_TNBC
#Experiment: breast_tcga_hormones
#corrected p-value cut-off:0.05
#Fold change cut-off:1.5
#Selected Test : Moderated T-Test
#p-value computation: Asymptotic
#Multiple Testing Correction: Benjamini-Hochberg
#
# Technology : Generic.SingleColor.miR_tcga_matrix
# Owner : gxuser
# Created On : Tue Dec 13 14:06:47 EET 2016
sample	p (Corr)	p	FC (abs)	Regulation	[normal_TNBC](normalized)	[tumor_TNBC](normalized)
hsa-mir-671	1.5446e-06	3.39635e-08	2.9268	up	2.20427	3.75359
hsa-mir-19a	9.96404e-05	5.42974e-06	4.67108	up	3.5938	5.81756
hsa-mir-1254	0.038864	0.00605624	1.68482	up	0.371422	1.12401
hsa-mir-1258	5.73111e-05	2.73953e-06	2.78803	down	2.24922	0.769978
hsa-mir-125b-1	4.92998e-05	2.30945e-06	3.29607	down	10.9544	9.23364
hsa-mir-125b-2	0.000515503	3.59768e-05	3.02909	down	5.84258	4.24369
hsa-mir-486	3.27008e-10	1.53718e-12	19.7453	down	9.58566	5.28222
hsa-mir-484	0.0115207	0.00149791	2.02345	up	5.66228	6.6791
hsa-mir-3127	0.02716	0.00392081	2.00287	up	2.27001	3.27208
hsa-mir-195	0.000329366	2.20417e-05	2.6342	down	6.67979	5.28243
hsa-mir-197	0.0114428	0.0014659	2.10831	up	7.98797	9.06405
hsa-mir-191	0.00210519	0.000184858	2.48868	up	8.44007	9.75545
hsa-mir-192	2.51503e-05	9.13682e-07	3.35668	up	7.3066	9.05363
hsa-mir-200b	0.00102961	7.87468e-05	4.46732	up	7.28004	9.43946
hsa-mir-200a	7.21128e-05	3.58496e-06	6.3133	up	7.24569	9.90408
hsa-mir-99a	1.39073e-06	2.56797e-08	4.98277	down	11.4062	9.08921
hsa-mir-193a	0.000614134	4.43156e-05	2.09584	down	9.71013	8.6426
hsa-mir-3648	0.00239987	0.000223888	2.77143	up	0.681044	2.15167
hsa-mir-576	0.00317014	0.00033338	2.48806	up	3.13338	4.4484
hsa-mir-424	1.93739e-05	6.8531e-07	3.75935	up	5.53491	7.44539
hsa-mir-17	1.16512e-05	3.56441e-07	4.36436	up	8.30028	10.426
hsa-mir-145	1.24963e-06	2.15042e-08	4.99548	down	12.3917	10.0711
hsa-mir-141	5.31705e-07	8.64147e-09	9.40473	up	7.75422	10.9876
hsa-mir-939	0.0327397	0.00497668	1.69808	up	0.694367	1.45827
hsa-mir-937	6.19346e-05	3.01975e-06	4.97533	up	0.478456	2.79325
hsa-mir-934	0.0384362	0.00595283	4.95486	up	1.59707	3.90591
hsa-mir-345	2.89915e-05	1.14005e-06	4.928	up	2.79452	5.09553
hsa-mir-340	4.31478e-08	4.53753e-10	3.00346	up	3.69426	5.28088
hsa-mir-106a	0.0327397	0.00494353	3.13631	up	3.42519	5.07426
hsa-mir-106b	0.000119152	6.60688e-06	2.51643	up	8.73898	10.0704
hsa-mir-607	0.00169487	0.000142589	1.51031	down	0.851422	0.256578
hsa-mir-942	0.0458133	0.00740195	1.94415	up	2.4682	3.42734
hsa-mir-3605	0.0042653	0.000460783	2.50646	up	1.10029	2.42594
hsa-mir-204	2.35322e-06	5.39937e-08	7.55906	down	4.61314	1.69494
hsa-mir-760	0.00641424	0.000729727	2.62979	up	0.509256	1.9042
hsa-mir-1247	0.00286721	0.000282336	5.67814	down	6.60239	4.09697
hsa-mir-493	0.00587867	0.000663177	2.68479	up	2.05308	3.47789
hsa-mir-3136	0.0114736	0.00148082	1.61087	up	0.2696	0.957438
hsa-mir-182	0.00194624	0.000167459	2.9721	up	13.2853	14.8568
hsa-mir-183	3.44703e-06	8.23859e-08	6.22377	up	11.2742	13.912
hsa-mir-186	0.0114428	0.0014606	1.95738	up	7.97507	8.94399
hsa-mir-187	0.0273912	0.00398036	4.34867	up	2.55907	4.67964
hsa-mir-185	0.0404719	0.00642288	1.58069	up	5.68659	6.34714
hsa-mir-188	6.52464e-06	1.87131e-07	3.81682	up	0.702578	2.63495
hsa-let-7c	1.5418e-05	4.86419e-07	3.7235	down	12.8636	10.967
hsa-mir-429	4.27952e-06	1.18648e-07	9.33088	up	3.92737	7.14938
hsa-mir-381	0.0274989	0.00404229	2.14025	down	5.75064	4.65287
hsa-mir-383	0.0405062	0.00646706	2.26675	down	1.74876	0.568133
hsa-mir-421	0.000317258	2.09281e-05	2.48461	up	1.22878	2.5418
hsa-mir-423	0.0147202	0.00202649	1.62861	up	6.77547	7.47911
hsa-let-7g	0.00523079	0.000580088	1.67264	up	8.76903	9.51116
hsa-mir-18a	3.56372e-06	9.1989e-08	6.15408	up	2.49193	5.11348
hsa-let-7d	0.000134358	7.70697e-06	2.49616	up	8.37749	9.6972
hsa-mir-545	0.0117036	0.00153288	1.81726	up	0.3673	1.22907
hsa-mir-15a	0.0003741	2.5393e-05	1.97855	up	6.36405	7.3485
hsa-mir-15b	0.00210519	0.00018516	2.74026	up	7.00512	8.45943
hsa-mir-147b	0.0383791	0.0059073	1.7283	up	0.224878	1.01423
hsa-mir-337	0.00426773	0.000465125	3.22246	down	6.1578	4.46964
hsa-mir-331	0.000553687	3.91709e-05	2.70959	up	3.7325	5.17057
hsa-mir-2277	0.00858086	0.00102544	1.83203	up	0.418133	1.29158
hsa-mir-3676	0.01044	0.00129751	2.90519	up	1.07523	2.61387
hsa-mir-3677	0.00234764	0.000210973	3.14777	up	2.1078	3.76213
hsa-mir-151	0.00948602	0.00116988	1.81713	up	10.7135	11.5751
hsa-mir-155	7.74953e-05	4.0748e-06	4.04042	up	7.21843	9.23294
hsa-mir-877	4.92998e-05	2.29005e-06	3.26839	up	0.644178	2.35276
hsa-mir-20a	0.00239987	0.000227138	2.97322	up	7.2122	8.78422
hsa-mir-181d	0.0234848	0.0033229	2.27773	up	3.75681	4.94441
hsa-mir-33a	1.48899e-07	1.85056e-09	7.42579	up	2.03934	4.93189
hsa-mir-33b	3.12593e-05	1.28504e-06	4.80005	up	0.685656	2.9487
hsa-mir-1307	2.77022e-05	1.05936e-06	3.12518	up	9.22857	10.8725
hsa-mir-320b-2	0.00146895	0.00011571	2.56263	up	1.71462	3.07225
hsa-mir-21	5.98357e-12	1.71613e-14	3.97157	up	15.8128	17.8025
hsa-mir-3170	0.00231221	0.000205579	2.7803	up	0.562533	2.03777
hsa-mir-615	0.0280856	0.00418867	2.22219	up	2.08956	3.24154
hsa-mir-3074	0.00721393	0.000841395	2.88158	up	2.59003	4.11689
hsa-mir-758	0.0486305	0.00799661	2.13199	down	4.8989	3.8067
hsa-mir-500a	0.00946877	0.0011587	1.89905	up	7.54357	8.46884
hsa-mir-1277	4.68837e-05	2.06181e-06	2.71646	up	0.0966889	1.53842
hsa-mir-30c-1	0.017895	0.00249778	1.598	up	0.902022	1.57829
hsa-mir-130b	6.11177e-09	4.6744e-11	5.99954	up	3.00803	5.59289
hsa-mir-502	0.00284743	0.000277665	1.91017	up	2.80681	3.74051
hsa-mir-503	1.24128e-07	1.42403e-09	5.70451	up	1.73507	4.24717
hsa-mir-501	0.00866857	0.00104421	2.15621	up	5.06621	6.17471
hsa-mir-940	2.77022e-05	1.03935e-06	4.22676	up	0.702033	2.78159
hsa-mir-146b	0.00393289	0.000420982	2.20128	up	8.83772	9.97607
hsa-mir-379	0.00667517	0.000765794	2.65195	down	10.4561	9.04909
hsa-mir-579	0.00745271	0.000877275	1.91016	up	0.176378	1.11007
hsa-mir-181a-1	0.0492983	0.00829493	1.71196	up	10.1499	10.9255
hsa-mir-200c	0.000140448	8.59339e-06	4.55252	up	11.4034	13.59
hsa-mir-577	0.00111717	8.65116e-05	10.5705	up	1.18141	4.58339
hsa-mir-550a-1	0.0238898	0.00340304	2.0211	up	1.42453	2.43968
hsa-mir-3200	0.000626715	4.6734e-05	4.12981	up	0.949744	2.99582
hsa-mir-210	3.27008e-10	1.56314e-12	27.2018	up	4.86546	9.63109
hsa-mir-92b	0.0476401	0.0077882	2.05133	up	5.80286	6.83942
hsa-mir-3682	0.012296	0.00162222	1.7763	up	0.739011	1.56789
hsa-mir-3687	0.0490245	0.00814713	2.05333	up	0.208244	1.24621
hsa-mir-3928	0.00168087	0.000138687	2.35583	up	0.683778	1.92001
hsa-mir-16-2	0.000174264	1.09956e-05	2.81768	up	2.61433	4.10884
hsa-mir-100	0.000141732	8.80741e-06	4.38141	down	13.4745	11.3431
hsa-mir-107	0.00302023	0.000312939	1.80318	up	5.43562	6.28617
hsa-mir-10b	3.83242e-12	7.32776e-15	6.81988	down	17.9608	15.191
hsa-mir-10a	0.000614134	4.47205e-05	3.11997	down	15.13	13.4885
hsa-mir-3664	0.0107053	0.00134073	2.37469	up	0.0477444	1.29548
hsa-mir-1292	0.010808	0.00136391	1.53516	up	0.147511	0.765902
hsa-mir-16-1	0.00239987	0.00022111	2.36487	up	8.47442	9.71618
hsa-mir-590	3.82138e-08	3.288e-10	5.51549	up	2.68509	5.14858
hsa-mir-1306	0.000201781	1.31177e-05	2.91725	up	2.53586	4.08047
hsa-mir-592	0.000405084	2.78834e-05	3.27301	up	0.392589	2.1032
hsa-mir-1301	1.63345e-09	9.36968e-12	5.41714	up	2.29532	4.73285
hsa-mir-196b	0.0490245	0.00815513	2.7714	up	6.96176	8.43237
hsa-mir-196a-1	0.00393289	0.000421112	4.32556	up	6.08622	8.19911
hsa-mir-9-1	0.0141222	0.00191716	5.29694	up	8.23857	10.6437
hsa-mir-29b-1	0.0274989	0.0040486	2.11782	up	7.09693	8.17952
hsa-mir-7-1	0.000124396	7.01657e-06	3.27586	up	3.47207	5.18394
hsa-mir-3940	0.00296892	0.000298028	2.00183	up	0.386167	1.38748
hsa-mir-144	1.57409e-05	5.26704e-07	7.93943	down	8.31921	5.33018
hsa-mir-143	0.00146895	0.000116561	2.99776	down	16.7676	15.1838
hsa-mir-140	0.0327397	0.00497176	2.05853	down	10.8145	9.77287
hsa-mir-181c	0.00580425	0.000649233	2.34928	up	5.71392	6.94614
hsa-mir-374a	0.00186577	0.000158751	1.76351	up	9.09224	9.91069
hsa-mir-181b-1	3.42482e-05	1.47339e-06	3.35425	up	7.19828	8.94427
hsa-mir-1-2	1.5446e-06	3.26656e-08	5.49037	down	4.35977	1.90286
hsa-mir-766	0.00480013	0.000527739	2.31116	up	2.48112	3.68974
hsa-mir-744	0.0127116	0.00170137	2.23888	up	4.71134	5.87412
hsa-mir-3065	0.0394852	0.00619079	2.61481	up	3.67404	5.06075
hsa-mir-365-2	0.00239987	0.000226406	2.46884	down	6.53544	5.23161
hsa-mir-139	6.18781e-17	5.91569e-20	10.7317	down	8.42732	5.00351
hsa-mir-365-1	0.00168087	0.000139805	2.46386	down	6.55997	5.25905
hsa-mir-451	7.35537e-06	2.17989e-07	9.7457	down	10.4875	7.20271
hsa-mir-101-2	0.000140448	8.54082e-06	2.55885	down	6.44475	5.08925
hsa-mir-128-1	9.45413e-05	5.06149e-06	2.34052	up	5.59904	6.82587
hsa-mir-128-2	0.000190694	1.22147e-05	2.57568	up	4.88016	6.24511
hsa-mir-32	3.35396e-09	2.24452e-11	4.14032	up	3.19226	5.242
hsa-mir-19b-2	0.00163683	0.000131447	2.93695	up	6.24478	7.79909
hsa-mir-19b-1	0.000140448	8.24078e-06	3.37145	up	2.116	3.86937
hsa-mir-24-2	0.0171903	0.00238297	1.70764	up	10.2799	11.0519
hsa-mir-3613	7.33767e-05	3.71794e-06	2.63474	up	2.74694	4.1446
hsa-mir-27a	0.00296641	0.000294939	2.06187	up	9.49631	10.5403
hsa-mir-616	1.39073e-06	2.65914e-08	3.66716	up	0.643744	2.51841
hsa-mir-708	0.0123115	0.00163603	1.92307	up	6.06531	7.00872
hsa-mir-3934	0.0280856	0.00416289	1.80836	up	0.953333	1.80802
hsa-mir-3652	0.0030025	0.000304269	1.77628	up	0.2071	1.03596
hsa-mir-323b	0.0463987	0.0075409	2.18685	up	1.24388	2.37273
hsa-mir-133a-1	1.83335e-05	6.30982e-07	4.37722	down	3.62458	1.49456
hsa-mir-532	0.0436126	0.00700471	1.61402	up	9.32378	10.0144
hsa-mir-769	0.00745271	0.000883495	1.8996	up	4.33248	5.25818
hsa-mir-3199-2	0.00899933	0.00109265	1.59365	down	1.42076	0.748422
hsa-mir-519a-1	0.0369882	0.00565785	4.85213	up	0.210622	2.48924
hsa-mir-639	0.00281521	0.000271832	1.62822	up	0.0501222	0.75342
hsa-mir-505	0.00239987	0.000225559	2.75119	up	5.12422	6.58428
hsa-mir-181b-2	1.55315e-05	5.04848e-07	3.36756	up	1.37669	3.12839
hsa-mir-103-2	0.00098123	7.41082e-05	2.19972	up	2.70703	3.84435
hsa-mir-497	0.0255301	0.0036611	1.98705	down	5.62846	4.63783
hsa-mir-301b	7.74607e-05	3.99893e-06	3.84726	up	0.206956	2.15079
hsa-mir-301a	3.78441e-07	5.42698e-09	6.83891	up	1.93191	4.70568
hsa-mir-98	0.000140448	8.48701e-06	2.39113	up	5.19536	6.45305
hsa-mir-93	3.42482e-05	1.44432e-06	3.06369	up	11.3511	12.9663
hsa-mir-96	4.31478e-08	4.32152e-10	6.12932	up	2.4038	5.01953
hsa-mir-135b	3.99211e-06	1.06863e-07	17.4396	up	1.49291	5.61721
hsa-mir-148b	4.48056e-07	6.85363e-09	2.94466	up	6.17937	7.73747
hsa-mir-148a	4.92998e-05	2.24334e-06	3.24217	up	14.1705	15.8674
hsa-mir-454	3.56372e-06	9.10406e-08	3.21661	up	2.15018	3.83572
hsa-mir-455	1.88741e-07	2.52618e-09	8.44877	up	5.87027	8.94901
hsa-mir-629	0.0141298	0.0019317	1.75131	up	6.30929	7.11772
hsa-mir-3610	0.00261179	0.000249693	1.99924	up	0.2356	1.23505
hsa-mir-142	1.5446e-06	3.20206e-08	7.96236	up	8.79166	11.7849
hsa-mir-3615	0.00720611	0.000833594	2.22875	up	1.2967	2.45293
hsa-mir-9-2	0.0141222	0.00190727	5.29688	up	8.24723	10.6524
hsa-mir-432	0.0398047	0.00627894	2.30803	down	3.5898	2.38314
hsa-mir-324	0.000614134	4.52087e-05	2.58378	up	4.74576	6.11524
hsa-mir-500b	0.00168087	0.000137845	2.32054	up	1.84498	3.05944

## Sheet: Sheet1
sample	p (Corr)	p	FC (abs)	Regulation	[normal_TNBC](normalized)	[tumor_TNBC](normalized)
hsa-mir-486	3.27008e-10	1.53718e-12	-19.7453	down	9.58566	5.28222
hsa-mir-139	6.18781e-17	5.91569e-20	-10.7317	down	8.42732	5.00351
hsa-mir-451	7.35537e-06	2.17989e-07	-9.7457	down	10.4875	7.20271
hsa-mir-144	1.57409e-05	5.26704e-07	-7.93943	down	8.31921	5.33018
hsa-mir-204	2.35322e-06	5.39937e-08	-7.55906	down	4.61314	1.69494
hsa-mir-10b	3.83242e-12	7.32776e-15	-6.81988	down	17.9608	15.191
hsa-mir-1247	0.00286721	0.000282336	-5.67814	down	6.60239	4.09697
hsa-mir-1-2	1.5446e-06	3.26656e-08	-5.49037	down	4.35977	1.90286
hsa-mir-145	1.24963e-06	2.15042e-08	-4.99548	down	12.3917	10.0711
hsa-mir-99a	1.39073e-06	2.56797e-08	-4.98277	down	11.4062	9.08921
hsa-mir-100	0.000141732	8.80741e-06	-4.38141	down	13.4745	11.3431
hsa-mir-133a-1	1.83335e-05	6.30982e-07	-4.37722	down	3.62458	1.49456
hsa-let-7c	1.5418e-05	4.86419e-07	-3.7235	down	12.8636	10.967
hsa-mir-125b-1	4.92998e-05	2.30945e-06	-3.29607	down	10.9544	9.23364
hsa-mir-337	0.00426773	0.000465125	-3.22246	down	6.1578	4.46964
hsa-mir-10a	0.000614134	4.47205e-05	-3.11997	down	15.13	13.4885
hsa-mir-125b-2	0.000515503	3.59768e-05	-3.02909	down	5.84258	4.24369
hsa-mir-143	0.00146895	0.000116561	-2.99776	down	16.7676	15.1838
hsa-mir-1258	5.73111e-05	2.73953e-06	-2.78803	down	2.24922	0.769978
hsa-mir-379	0.00667517	0.000765794	-2.65195	down	10.4561	9.04909
hsa-mir-195	0.000329366	2.20417e-05	-2.6342	down	6.67979	5.28243
hsa-mir-101-2	0.000140448	8.54082e-06	-2.55885	down	6.44475	5.08925
hsa-mir-365-2	0.00239987	0.000226406	-2.46884	down	6.53544	5.23161
hsa-mir-365-1	0.00168087	0.000139805	-2.46386	down	6.55997	5.25905
hsa-mir-432	0.0398047	0.00627894	-2.30803	down	3.5898	2.38314
hsa-mir-383	0.0405062	0.00646706	-2.26675	down	1.74876	0.568133
hsa-mir-381	0.0274989	0.00404229	-2.14025	down	5.75064	4.65287
hsa-mir-758	0.0486305	0.00799661	-2.13199	down	4.8989	3.8067
hsa-mir-193a	0.000614134	4.43156e-05	-2.09584	down	9.71013	8.6426
hsa-mir-140	0.0327397	0.00497176	-2.05853	down	10.8145	9.77287
hsa-mir-497	0.0255301	0.0036611	-1.98705	down	5.62846	4.63783
hsa-mir-3199-2	0.00899933	0.00109265	-1.59365	down	1.42076	0.748422
hsa-mir-607	0.00169487	0.000142589	-1.51031	down	0.851422	0.256578
hsa-mir-210	3.27008e-10	1.56314e-12	27.2018	up	4.86546	9.63109
hsa-mir-135b	3.99211e-06	1.06863e-07	17.4396	up	1.49291	5.61721
hsa-mir-577	0.00111717	8.65116e-05	10.5705	up	1.18141	4.58339
hsa-mir-141	5.31705e-07	8.64147e-09	9.40473	up	7.75422	10.9876
hsa-mir-429	4.27952e-06	1.18648e-07	9.33088	up	3.92737	7.14938
hsa-mir-455	1.88741e-07	2.52618e-09	8.44877	up	5.87027	8.94901
hsa-mir-142	1.5446e-06	3.20206e-08	7.96236	up	8.79166	11.7849
hsa-mir-33a	1.48899e-07	1.85056e-09	7.42579	up	2.03934	4.93189
hsa-mir-301a	3.78441e-07	5.42698e-09	6.83891	up	1.93191	4.70568
hsa-mir-200a	7.21128e-05	3.58496e-06	6.3133	up	7.24569	9.90408
hsa-mir-183	3.44703e-06	8.23859e-08	6.22377	up	11.2742	13.912
hsa-mir-18a	3.56372e-06	9.1989e-08	6.15408	up	2.49193	5.11348
hsa-mir-96	4.31478e-08	4.32152e-10	6.12932	up	2.4038	5.01953
hsa-mir-130b	6.11177e-09	4.6744e-11	5.99954	up	3.00803	5.59289
hsa-mir-503	1.24128e-07	1.42403e-09	5.70451	up	1.73507	4.24717
hsa-mir-590	3.82138e-08	3.288e-10	5.51549	up	2.68509	5.14858
hsa-mir-1301	1.63345e-09	9.36968e-12	5.41714	up	2.29532	4.73285
hsa-mir-9-1	0.0141222	0.00191716	5.29694	up	8.23857	10.6437
hsa-mir-9-2	0.0141222	0.00190727	5.29688	up	8.24723	10.6524
hsa-mir-937	6.19346e-05	3.01975e-06	4.97533	up	0.478456	2.79325
hsa-mir-934	0.0384362	0.00595283	4.95486	up	1.59707	3.90591
hsa-mir-345	2.89915e-05	1.14005e-06	4.928	up	2.79452	5.09553
hsa-mir-519a-1	0.0369882	0.00565785	4.85213	up	0.210622	2.48924
hsa-mir-33b	3.12593e-05	1.28504e-06	4.80005	up	0.685656	2.9487
hsa-mir-19a	9.96404e-05	5.42974e-06	4.67108	up	3.5938	5.81756
hsa-mir-200c	0.000140448	8.59339e-06	4.55252	up	11.4034	13.59
hsa-mir-200b	0.00102961	7.87468e-05	4.46732	up	7.28004	9.43946
hsa-mir-17	1.16512e-05	3.56441e-07	4.36436	up	8.30028	10.426
hsa-mir-187	0.0273912	0.00398036	4.34867	up	2.55907	4.67964
hsa-mir-196a-1	0.00393289	0.000421112	4.32556	up	6.08622	8.19911
hsa-mir-940	2.77022e-05	1.03935e-06	4.22676	up	0.702033	2.78159
hsa-mir-32	3.35396e-09	2.24452e-11	4.14032	up	3.19226	5.242
hsa-mir-3200	0.000626715	4.6734e-05	4.12981	up	0.949744	2.99582
hsa-mir-155	7.74953e-05	4.0748e-06	4.04042	up	7.21843	9.23294
hsa-mir-21	5.98357e-12	1.71613e-14	3.97157	up	15.8128	17.8025
hsa-mir-301b	7.74607e-05	3.99893e-06	3.84726	up	0.206956	2.15079
hsa-mir-188	6.52464e-06	1.87131e-07	3.81682	up	0.702578	2.63495
hsa-mir-424	1.93739e-05	6.8531e-07	3.75935	up	5.53491	7.44539
hsa-mir-616	1.39073e-06	2.65914e-08	3.66716	up	0.643744	2.51841
hsa-mir-19b-1	0.000140448	8.24078e-06	3.37145	up	2.116	3.86937
hsa-mir-181b-2	1.55315e-05	5.04848e-07	3.36756	up	1.37669	3.12839
hsa-mir-192	2.51503e-05	9.13682e-07	3.35668	up	7.3066	9.05363
hsa-mir-181b-1	3.42482e-05	1.47339e-06	3.35425	up	7.19828	8.94427
hsa-mir-7-1	0.000124396	7.01657e-06	3.27586	up	3.47207	5.18394
hsa-mir-592	0.000405084	2.78834e-05	3.27301	up	0.392589	2.1032
hsa-mir-877	4.92998e-05	2.29005e-06	3.26839	up	0.644178	2.35276
hsa-mir-148a	4.92998e-05	2.24334e-06	3.24217	up	14.1705	15.8674
hsa-mir-454	3.56372e-06	9.10406e-08	3.21661	up	2.15018	3.83572
hsa-mir-3677	0.00234764	0.000210973	3.14777	up	2.1078	3.76213
hsa-mir-106a	0.0327397	0.00494353	3.13631	up	3.42519	5.07426
hsa-mir-1307	2.77022e-05	1.05936e-06	3.12518	up	9.22857	10.8725
hsa-mir-93	3.42482e-05	1.44432e-06	3.06369	up	11.3511	12.9663
hsa-mir-340	4.31478e-08	4.53753e-10	3.00346	up	3.69426	5.28088
hsa-mir-20a	0.00239987	0.000227138	2.97322	up	7.2122	8.78422
hsa-mir-182	0.00194624	0.000167459	2.9721	up	13.2853	14.8568
hsa-mir-148b	4.48056e-07	6.85363e-09	2.94466	up	6.17937	7.73747
hsa-mir-19b-2	0.00163683	0.000131447	2.93695	up	6.24478	7.79909
hsa-mir-671	1.5446e-06	3.39635e-08	2.9268	up	2.20427	3.75359
hsa-mir-1306	0.000201781	1.31177e-05	2.91725	up	2.53586	4.08047
hsa-mir-3676	0.01044	0.00129751	2.90519	up	1.07523	2.61387
hsa-mir-3074	0.00721393	0.000841395	2.88158	up	2.59003	4.11689
hsa-mir-16-2	0.000174264	1.09956e-05	2.81768	up	2.61433	4.10884
hsa-mir-3170	0.00231221	0.000205579	2.7803	up	0.562533	2.03777
hsa-mir-3648	0.00239987	0.000223888	2.77143	up	0.681044	2.15167
hsa-mir-196b	0.0490245	0.00815513	2.7714	up	6.96176	8.43237
hsa-mir-505	0.00239987	0.000225559	2.75119	up	5.12422	6.58428
hsa-mir-15b	0.00210519	0.00018516	2.74026	up	7.00512	8.45943
hsa-mir-1277	4.68837e-05	2.06181e-06	2.71646	up	0.0966889	1.53842
hsa-mir-331	0.000553687	3.91709e-05	2.70959	up	3.7325	5.17057
hsa-mir-493	0.00587867	0.000663177	2.68479	up	2.05308	3.47789
hsa-mir-3613	7.33767e-05	3.71794e-06	2.63474	up	2.74694	4.1446
hsa-mir-760	0.00641424	0.000729727	2.62979	up	0.509256	1.9042
hsa-mir-3065	0.0394852	0.00619079	2.61481	up	3.67404	5.06075
hsa-mir-324	0.000614134	4.52087e-05	2.58378	up	4.74576	6.11524
hsa-mir-128-2	0.000190694	1.22147e-05	2.57568	up	4.88016	6.24511
hsa-mir-320b-2	0.00146895	0.00011571	2.56263	up	1.71462	3.07225
hsa-mir-106b	0.000119152	6.60688e-06	2.51643	up	8.73898	10.0704
hsa-mir-3605	0.0042653	0.000460783	2.50646	up	1.10029	2.42594
hsa-let-7d	0.000134358	7.70697e-06	2.49616	up	8.37749	9.6972
hsa-mir-191	0.00210519	0.000184858	2.48868	up	8.44007	9.75545
hsa-mir-576	0.00317014	0.00033338	2.48806	up	3.13338	4.4484
hsa-mir-421	0.000317258	2.09281e-05	2.48461	up	1.22878	2.5418
hsa-mir-98	0.000140448	8.48701e-06	2.39113	up	5.19536	6.45305
hsa-mir-3664	0.0107053	0.00134073	2.37469	up	0.0477444	1.29548
hsa-mir-16-1	0.00239987	0.00022111	2.36487	up	8.47442	9.71618
hsa-mir-3928	0.00168087	0.000138687	2.35583	up	0.683778	1.92001
hsa-mir-181c	0.00580425	0.000649233	2.34928	up	5.71392	6.94614
hsa-mir-128-1	9.45413e-05	5.06149e-06	2.34052	up	5.59904	6.82587
hsa-mir-500b	0.00168087	0.000137845	2.32054	up	1.84498	3.05944
hsa-mir-766	0.00480013	0.000527739	2.31116	up	2.48112	3.68974
hsa-mir-181d	0.0234848	0.0033229	2.27773	up	3.75681	4.94441
hsa-mir-744	0.0127116	0.00170137	2.23888	up	4.71134	5.87412
hsa-mir-3615	0.00720611	0.000833594	2.22875	up	1.2967	2.45293
hsa-mir-615	0.0280856	0.00418867	2.22219	up	2.08956	3.24154
hsa-mir-146b	0.00393289	0.000420982	2.20128	up	8.83772	9.97607
hsa-mir-103-2	0.00098123	7.41082e-05	2.19972	up	2.70703	3.84435
hsa-mir-323b	0.0463987	0.0075409	2.18685	up	1.24388	2.37273
hsa-mir-501	0.00866857	0.00104421	2.15621	up	5.06621	6.17471
hsa-mir-29b-1	0.0274989	0.0040486	2.11782	up	7.09693	8.17952
hsa-mir-197	0.0114428	0.0014659	2.10831	up	7.98797	9.06405
hsa-mir-27a	0.00296641	0.000294939	2.06187	up	9.49631	10.5403
hsa-mir-3687	0.0490245	0.00814713	2.05333	up	0.208244	1.24621
hsa-mir-92b	0.0476401	0.0077882	2.05133	up	5.80286	6.83942
hsa-mir-484	0.0115207	0.00149791	2.02345	up	5.66228	6.6791
hsa-mir-550a-1	0.0238898	0.00340304	2.0211	up	1.42453	2.43968
hsa-mir-3127	0.02716	0.00392081	2.00287	up	2.27001	3.27208
hsa-mir-3940	0.00296892	0.000298028	2.00183	up	0.386167	1.38748
hsa-mir-3610	0.00261179	0.000249693	1.99924	up	0.2356	1.23505
hsa-mir-15a	0.0003741	2.5393e-05	1.97855	up	6.36405	7.3485
hsa-mir-186	0.0114428	0.0014606	1.95738	up	7.97507	8.94399
hsa-mir-942	0.0458133	0.00740195	1.94415	up	2.4682	3.42734
hsa-mir-708	0.0123115	0.00163603	1.92307	up	6.06531	7.00872
hsa-mir-502	0.00284743	0.000277665	1.91017	up	2.80681	3.74051
hsa-mir-579	0.00745271	0.000877275	1.91016	up	0.176378	1.11007
hsa-mir-769	0.00745271	0.000883495	1.8996	up	4.33248	5.25818
hsa-mir-500a	0.00946877	0.0011587	1.89905	up	7.54357	8.46884
hsa-mir-2277	0.00858086	0.00102544	1.83203	up	0.418133	1.29158
hsa-mir-545	0.0117036	0.00153288	1.81726	up	0.3673	1.22907
hsa-mir-151	0.00948602	0.00116988	1.81713	up	10.7135	11.5751
hsa-mir-3934	0.0280856	0.00416289	1.80836	up	0.953333	1.80802
hsa-mir-107	0.00302023	0.000312939	1.80318	up	5.43562	6.28617
hsa-mir-3682	0.012296	0.00162222	1.7763	up	0.739011	1.56789
hsa-mir-3652	0.0030025	0.000304269	1.77628	up	0.2071	1.03596
hsa-mir-374a	0.00186577	0.000158751	1.76351	up	9.09224	9.91069
hsa-mir-629	0.0141298	0.0019317	1.75131	up	6.30929	7.11772
hsa-mir-147b	0.0383791	0.0059073	1.7283	up	0.224878	1.01423
hsa-mir-181a-1	0.0492983	0.00829493	1.71196	up	10.1499	10.9255
hsa-mir-24-2	0.0171903	0.00238297	1.70764	up	10.2799	11.0519
hsa-mir-939	0.0327397	0.00497668	1.69808	up	0.694367	1.45827
hsa-mir-1254	0.038864	0.00605624	1.68482	up	0.371422	1.12401
hsa-let-7g	0.00523079	0.000580088	1.67264	up	8.76903	9.51116
hsa-mir-423	0.0147202	0.00202649	1.62861	up	6.77547	7.47911
hsa-mir-639	0.00281521	0.000271832	1.62822	up	0.0501222	0.75342
hsa-mir-532	0.0436126	0.00700471	1.61402	up	9.32378	10.0144
hsa-mir-3136	0.0114736	0.00148082	1.61087	up	0.2696	0.957438
hsa-mir-30c-1	0.017895	0.00249778	1.598	up	0.902022	1.57829
hsa-mir-185	0.0404719	0.00642288	1.58069	up	5.68659	6.34714
hsa-mir-1292	0.010808	0.00136391	1.53516	up	0.147511	0.765902
